# Supplementary material for: Melatonin Supplementation Alters Maternal and Fetal Amino Acid Concentrations and Placental Nutrient Transporters in a Nutrient Restriction Bovine Model
Source: MDPI journal article supplement (doi:10.3390/metabo12121208), 2022-12-02
Supplement: s1 [file s1]

**Supplemental Table S1.** Individual amino acids summed for analysis by transport system and essential groups.

| System    | Amino Acids Included                                                                 |
|-----------|--------------------------------------------------------------------------------------|
| System A  | Alanine, serine, glutamine                                                           |
| System Br | Valine, leucine, isoleucine                                                          |
| System Bo | Phenylalanine, tyrosine, tryptophan, valine, leucine, isoleucine                     |
| System N  | Histidine, aspartic acid, glutamine                                                  |
| Cationic  | Lysine, ornithine                                                                    |
| Anion     | Aspartic acid, glutamic acid                                                         |
| Essential | Valine, leucine, isoleucine, threonine, methionine, phenylalanine, lysine, histidine |

**Supplemental Table S2.** Individual amino acids in maternal plasma in the fall replicate.

| Amino Acid (μmol/L)    | ADQ-CON                     | RES-CON                      | ADQ-MEL                      | RES-MEL                     | <i>P</i> value |             |                 |
|------------------------|-----------------------------|------------------------------|------------------------------|-----------------------------|----------------|-------------|-----------------|
|                        |                             |                              |                              |                             | NUT            | TRT         | NUT*TRT         |
| Alanine                | 186.58 ± 15.10 <sup>b</sup> | 345.87 ± 63.03 <sup>a</sup>  | 235.96 ± 42.49 <sup>a</sup>  | 188.55 ± 11.22 <sup>a</sup> | -              | -           | <b>0.05</b>     |
| Sarcosine              | 6.97 ± 0.28 <sup>c</sup>    | 8.82 ± 0.62 <sup>a</sup>     | 7.73 ± 0.40 <sup>abc</sup>   | 7.30 ± 0.26 <sup>b</sup>    | -              | -           | <b>0.01</b>     |
| Glycine                | 328.15 ± 41.74              | 324.81 ± 18.66               | 293.50 ± 13.98               | 315.74 ± 35.45              | 0.19           | 0.38        | 0.83            |
| α-Aminobutyric acid    | 14.38 ± 1.54 <sup>b</sup>   | 25.04 ± 3.88 <sup>a</sup>    | 17.71 ± 1.56 <sup>ab</sup>   | 17.15 ± 2.14 <sup>ab</sup>  | -              | -           | <b>0.02</b>     |
| Valine                 | 227.66 ± 12.59              | 201.01 ± 12.59               | 254.09 ± 12.59               | 238.16 ± 11.74              | 0.10           | <b>0.02</b> | 0.67            |
| β-Aminoisobutyric acid | 7.46 ± 0.18                 | 9.81 ± 1.20                  | 7.84 ± 0.43                  | 7.36 ± 0.33                 | 0.99           | 0.28        | 0.14            |
| Leucine                | 123.56 ± 7.76               | 103.89 ± 7.76                | 125.95 ± 7.76                | 127.14 ± 7.24               | 0.24           | 0.11        | 0.18            |
| Isoleucine             | 88.03 ± 7.54                | 68.52 ± 7.54                 | 90.35 ± 7.54                 | 89.50 ± 7.03                | 0.18           | 0.13        | 0.22            |
| Threonine              | 44.12 ± 3.84                | 42.42 ± 3.79                 | 54.96 ± 3.79                 | 45.05 ± 3.59                | 0.14           | 0.09        | 0.28            |
| Serine                 | 43.57 ± 4.68                | 58.08 ± 4.62                 | 51.60 ± 4.62                 | 48.84 ± 4.38                | 0.21           | 0.90        | 0.07            |
| Proline                | 60.81 ± 4.77                | 88.85 ± 9.44                 | 70.96 ± 9.46                 | 66.06 ± 5.30                | 0.11           | 0.75        | 0.06            |
| Asparagine             | 20.59 ± 1.71                | 26.20 ± 1.74                 | 23.89 ± 1.76                 | 24.19 ± 1.59                | 0.09           | 0.71        | 0.14            |
| Thiaproline            | 2.50 ± 0.42                 | 2.11 ± 0.55                  | 1.25 ± 0.59                  | 1.87 ± 0.55                 | 0.79           | 0.14        | 0.79            |
| Aspartic acid          | 10.12 ± 0.22 <sup>b</sup>   | 19.54 ± 3.82 <sup>a</sup>    | 12.20 ± 1.05 <sup>a</sup>    | 10.68 ± 0.58 <sup>ab</sup>  | -              | -           | <b>&lt;0.01</b> |
| Methionine             | 18.23 ± 0.96                | 19.48 ± 0.97                 | 21.47 ± 0.97                 | 19.70 ± 0.89                | 0.78           | 0.08        | 0.13            |
| 4-Hydroxyproline       | 21.01 ± 0.95                | 55.56 ± 13.23                | 29.90 ± 10.75                | 21.76 ± 1.14                | <b>0.04</b>    | 0.36        | 0.63            |
| Glutamic acid          | 66.60 ± 2.43 <sup>c</sup>   | 224.84 ± 59.45 <sup>a</sup>  | 95.48 ± 16.06 <sup>ab</sup>  | 79.33 ± 11.68 <sup>bc</sup> | -              | -           | <b>&lt;0.01</b> |
| Phenylalanine          | 45.85 ± 1.78                | 60.94 ± 6.81                 | 50.37 ± 3.83                 | 48.87 ± 2.51                | 0.14           | 0.95        | 0.18            |
| α-Aminoadipic acid     | 10.16 ± 0.28 <sup>b</sup>   | 12.31 ± 0.56 <sup>a</sup>    | 10.77 ± 0.54 <sup>ab</sup>   | 10.32 ± 1.99 <sup>b</sup>   | -              | -           | <b>0.03</b>     |
| Glutamine              | 280.27 ± 33.54 <sup>b</sup> | 635.50 ± 110.09 <sup>b</sup> | 398.92 ± 78.03 <sup>ab</sup> | 278.39 ± 59.15 <sup>b</sup> | -              | -           | <b>&lt;0.01</b> |
| Ornithine              | 48.63 ± 4.56                | 53.54 ± 4.56                 | 58.42 ± 4.56                 | 48.82 ± 4.26                | 0.60           | 0.57        | 0.12            |
| Glycine-proline        | 0.03 ± 0.02                 | 1.90 ± 0.73                  | 0.84 ± 0.83                  | 0.13 ± 0.09                 | 0.17           | 0.22        | 0.09            |
| Lysine                 | 60.34 ± 5.75 <sup>b</sup>   | 75.75 ± 5.75 <sup>a</sup>    | 71.36 ± 5.75 <sup>ab</sup>   | 57.50 ± 5.36 <sup>b</sup>   | -              | -           | <b>0.02</b>     |
| Histidine              | 41.18 ± 5.58                | 48.50 ± 5.58                 | 47.02 ± 5.58                 | 36.37 ± 5.20                | 0.76           | 0.57        | 0.11            |
| Hydroxylysine          | 8.84 ± 0.11 <sup>ab</sup>   | 9.29 ± 0.20 <sup>a</sup>     | 9.08 ± 0.16 <sup>ab</sup>    | 7.76 ± 1.13 <sup>b</sup>    | -              | -           | <b>0.02</b>     |
| Tyrosine               | 40.75 ± 3.98 <sup>b</sup>   | 52.05 ± 3.98 <sup>a</sup>    | 49.87 ± 3.98 <sup>ab</sup>   | 41.88 ± 3.71 <sup>ab</sup>  | -              | -           | <b>0.02</b>     |
| Proline-hydroxyproline | 19.12 ± 0.38                | 36.92 ± 7.55                 | 26.39 ± 7.58                 | 19.75 ± 0.39                | <b>0.02</b>    | 0.78        | 0.54            |
| Tryptophan             | 33.56 ± 2.58                | 35.51 ± 2.58                 | 35.30 ± 2.58                 | 29.07 ± 2.41                | 0.41           | 0.37        | 0.12            |
| Cystathionine          | 0.12 ± 0.12 <sup>ab</sup>   | 4.04 ± 2.02 <sup>a</sup>     | 0.92 ± 0.77 <sup>ab</sup>    | 0.00 ± 0.00 <sup>b</sup>    | -              | -           | <b>0.04</b>     |
| Cystine                | 16.24 ± 1.12 <sup>bc</sup>  | 19.29 ± 1.44 <sup>ab</sup>   | 19.03 ± 1.03 <sup>a</sup>    | 11.40 ± 2.52 <sup>c</sup>   | -              | -           | <b>&lt;0.01</b> |

Data are presented as means ± standard error. Bolded *P* values are significant at  $P \leq 0.05$ . When there is a significant interaction, the *P* values for main effects of nutrition and treatment are not shown and replaced with a dash (-). Superscripts(a,b,c) denotes differences at  $P \leq 0.05$ . Concentrations are expressed in μmol/L. Experimental units: ADQ-CON, n = 6; RES-CON, n = 6; ADQ-MEL, n = 6; RES-MEL n = 7. Abbreviations: NUT, nutrition; TRT, treatment; NUT\*TRT, nutrition by treatment interaction; ADQ-CON, adequately fed control; RES-CON, restricted fed control; ADQ-MEL, adequately fed melatonin supplemented; RES-MEL, restricted fed melatonin supplemented.

**Supplemental Table S3.** Individual amino acids in fetal plasma in the fall replicate.

| Amino Acid (μmol/L)    |          |        |          |        |          |        |          |        | <i>P</i> value |             |         |
|------------------------|----------|--------|----------|--------|----------|--------|----------|--------|----------------|-------------|---------|
|                        | ADQ-CON  |        | RES-CON  |        | ADQ-MEL  |        | RES-MEL  |        | NUT            | TRT         | NUT*TRT |
| Alanine                | 454.89 ± | 40.12  | 453.04 ± | 40.12  | 459.44 ± | 40.12  | 432.80 ± | 37.43  | 0.72           | 0.84        | 0.76    |
| Sarcosine              | 9.91 ±   | 0.73   | 9.77 ±   | 0.54   | 10.13 ±  | 0.89   | 9.25 ±   | 0.44   | 0.53           | 0.56        | 0.93    |
| Glycine                | 328.83 ± | 18.73  | 300.82 ± | 18.89  | 291.32 ± | 19.72  | 325.88 ± | 17.94  | 0.87           | 0.74        | 0.10    |
| α-Aminobutyric acid    | 28.33 ±  | 3.70   | 32.68 ±  | 3.70   | 30.43 ±  | 3.70   | 28.39 ±  | 3.45   | 0.75           | 0.77        | 0.39    |
| Valine                 | 210.29 ± | 18.80  | 211.51 ± | 18.96  | 200.31 ± | 19.79  | 218.02 ± | 18.01  | 0.65           | 0.93        | 0.66    |
| β-Aminoisobutyric acid | 11.78 ±  | 0.87   | 10.38 ±  | 0.87   | 10.59 ±  | 0.87   | 11.63 ±  | 0.81   | 0.84           | 0.97        | 0.17    |
| Leucine                | 90.21 ±  | 6.67   | 84.93 ±  | 6.85   | 86.34 ±  | 7.13   | 84.44 ±  | 6.31   | 0.62           | 0.75        | 0.80    |
| Isoleucine             | 57.33 ±  | 4.76   | 57.41 ±  | 4.89   | 54.63 ±  | 5.08   | 53.75 ±  | 4.50   | 0.94           | 0.51        | 0.92    |
| Threonine              | 49.72 ±  | 3.29   | 37.97 ±  | 3.78   | 51.83 ±  | 5.11   | 35.01 ±  | 5.64   | 0.18           | 0.71        | 0.20    |
| Serine                 | 75.12 ±  | 7.65   | 71.53 ±  | 8.26   | 77.74 ±  | 8.13   | 75.95 ±  | 7.20   | 0.75           | 0.65        | 0.91    |
| Proline                | 103.89 ± | 6.18   | 105.37 ± | 6.35   | 101.53 ± | 6.61   | 100.25 ± | 5.85   | 0.99           | 0.56        | 0.82    |
| Asparagine             | 24.50 ±  | 1.25   | 25.76 ±  | 1.25   | 24.27 ±  | 1.25   | 23.36 ±  | 1.17   | 0.89           | 0.30        | 0.39    |
| Thiaproline            | 1.26 ±   | 0.59   | 2.08 ±   | 0.54   | 1.25 ±   | 0.59   | 1.82 ±   | 0.53   | 0.59           | 0.98        | 0.99    |
| Aspartic acid          | 23.81 ±  | 1.79   | 18.51 ±  | 2.31   | 26.00 ±  | 3.01   | 24.56 ±  | 2.36   | 0.23           | 0.15        | 0.66    |
| Methionine             | 20.52 ±  | 1.41   | 19.69 ±  | 1.42   | 23.14 ±  | 1.43   | 18.28 ±  | 1.32   | <b>0.05</b>    | 0.67        | 0.17    |
| 4-Hydroxyproline       | 77.53 ±  | 6.31   | 78.69 ±  | 6.31   | 83.48 ±  | 6.31   | 75.15 ±  | 5.88   | 0.57           | 0.85        | 0.45    |
| Glutamic acid          | 306.37 ± | 38.63  | 262.23 ± | 39.69  | 362.37 ± | 41.29  | 377.23 ± | 36.54  | 0.72           | <b>0.04</b> | 0.45    |
| Phenylalanine          | 81.70 ±  | 5.30   | 78.67 ±  | 5.72   | 70.03 ±  | 5.63   | 81.53 ±  | 4.99   | 0.47           | 0.41        | 0.19    |
| α-Aminoadipic acid     | 13.31 ±  | 0.38   | 12.90 ±  | 0.43   | 13.26 ±  | 0.46   | 14.32 ±  | 1.30   | 0.44           | 0.85        | 0.36    |
| Glutamine              | 696.38 ± | 121.28 | 690.72 ± | 121.28 | 808.77 ± | 121.28 | 730.39 ± | 113.17 | 0.73           | 0.53        | 0.76    |
| Ornithine              | 55.61 ±  | 6.43   | 58.69 ±  | 6.54   | 69.40 ±  | 6.61   | 62.15 ±  | 5.97   | 0.74           | 0.19        | 0.44    |
| Glycine-proline        | 3.85 ±   | 0.72   | 2.32 ±   | 0.74   | 3.70 ±   | 0.77   | 3.00 ±   | 0.68   | 0.16           | 0.72        | 0.57    |
| Lysine                 | 78.50 ±  | 7.52   | 73.75 ±  | 7.52   | 81.35 ±  | 7.52   | 67.21 ±  | 7.02   | 0.21           | 0.81        | 0.53    |
| Histidine              | 49.63 ±  | 6.48   | 35.90 ±  | 6.48   | 50.42 ±  | 6.48   | 38.65 ±  | 6.05   | 0.06           | 0.78        | 0.88    |
| Hydroxylysine          | 9.81 ±   | 0.22   | 9.75 ±   | 0.26   | 10.02 ±  | 0.24   | 9.94 ±   | 0.21   | 0.83           | 0.32        | 0.96    |
| Tyrosine               | 63.30 ±  | 5.73   | 63.25 ±  | 6.18   | 60.70 ±  | 6.09   | 59.43 ±  | 5.39   | 0.92           | 0.58        | 0.92    |
| Proline-hydroxyproline | 55.84 ±  | 5.60   | 45.04 ±  | 5.60   | 58.51 ±  | 5.60   | 47.61 ±  | 5.23   | 0.06           | 0.64        | 0.99    |
| Tryptophan             | 42.94 ±  | 3.94   | 38.64 ±  | 3.94   | 41.63 ±  | 3.94   | 32.47 ±  | 3.67   | 0.09           | 0.35        | 0.54    |
| Cystathionine          | 6.81 ±   | 1.92   | 5.59 ±   | 1.92   | 8.58 ±   | 1.92   | 7.59 ±   | 1.79   | 0.56           | 0.33        | 0.95    |
| Cystine                | 18.72 ±  | 0.48   | 17.92 ±  | 1.29   | 20.20 ±  | 1.22   | 15.78 ±  | 2.37   | 0.13           | 0.71        | 0.32    |

Data are presented as means ± standard error. Bolded *P* values are significant at  $P \leq 0.05$ . When there is a significant interaction, the *P* values for main effects of nutrition and treatment are not shown and replaced with a dash (-). Superscripts(a,b,c) denotes differences at  $P \leq 0.05$ . Concentrations are expressed in μmol/L. Experimental units: ADQ-CON, n = 6; RES-CON, n = 6; ADQ-MEL, n = 6; RES-MEL n = 7. Abbreviations: NUT, nutrition; TRT, treatment; NUT\*TRT, nutrition by treatment interaction; ADQ-CON, adequately fed control; RES-CON, restricted fed control; ADQ-MEL, adequately fed melatonin supplemented; RES-MEL, restricted fed melatonin supplemented.

**Supplemental Table S4.** Individual amino acids in amnion in the fall replicate.

| Amino Acid (μmol/L)    | ADQ-CON                    | RES-CON                      | ADQ-MEL                      | RES-MEL                      | <i>P</i> value |      |                 |
|------------------------|----------------------------|------------------------------|------------------------------|------------------------------|----------------|------|-----------------|
|                        |                            |                              |                              |                              | NUT            | TRT  | NUT*TRT         |
| Alanine                | 61.35 ± 13.73 <sup>b</sup> | 156.58 ± 27.80 <sup>a</sup>  | 209.48 ± 80.92 <sup>a</sup>  | 108.93 ± 50.15 <sup>ab</sup> | -              | -    | <b>&lt;0.01</b> |
| Sarcosine              | 5.01 ± 0.34                | 6.12 ± 0.45                  | 6.60 ± 0.92                  | 6.09 ± 1.21                  | -              | -    | <b>0.05</b>     |
| Glycine                | 56.09 ± 14.46 <sup>b</sup> | 193.54 ± 41.24 <sup>a</sup>  | 201.88 ± 62.83 <sup>a</sup>  | 129.96 ± 75.90 <sup>ab</sup> | -              | -    | <b>&lt;0.01</b> |
| α-Aminobutyric acid    | 6.24 ± 0.74 <sup>c</sup>   | 12.01 ± 1.66 <sup>ab</sup>   | 13.35 ± 2.72 <sup>a</sup>    | 8.03 ± 1.86 <sup>bc</sup>    | -              | -    | <b>&lt;0.01</b> |
| Valine                 | 18.86 ± 4.69 <sup>c</sup>  | 134.91 ± 54.62 <sup>a</sup>  | 115.05 ± 45.29 <sup>ab</sup> | 20.42 ± 4.64 <sup>bc</sup>   | -              | -    | <b>&lt;0.01</b> |
| β-Aminoisobutyric acid | 6.29 ± 0.34                | 6.37 ± 0.44                  | 6.90 ± 0.31                  | 6.72 ± 0.70                  | 0.65           | 0.34 | 0.44            |
| Leucine                | 9.69 ± 1.44 <sup>b</sup>   | 71.83 ± 29.76 <sup>a</sup>   | 62.27 ± 25.54 <sup>a</sup>   | 9.93 ± 1.59 <sup>b</sup>     | -              | -    | <b>&lt;0.01</b> |
| Isoleucine             | 5.87 ± 0.80 <sup>b</sup>   | 49.57 ± 20.57 <sup>a</sup>   | 38.05 ± 16.03 <sup>a</sup>   | 6.08 ± 1.00 <sup>b</sup>     | -              | -    | <b>&lt;0.01</b> |
| Threonine              | 11.77 ± 1.85 <sup>b</sup>  | 33.76 ± 10.97 <sup>a</sup>   | 34.39 ± 11.16 <sup>a</sup>   | 12.72 ± 2.71 <sup>b</sup>    | -              | -    | <b>&lt;0.01</b> |
| Serine                 | 16.00 ± 1.66 <sup>b</sup>  | 36.06 ± 8.30 <sup>a</sup>    | 31.13 ± 5.85 <sup>a</sup>    | 25.99 ± 11.12 <sup>b</sup>   | -              | -    | <b>&lt;0.01</b> |
| Proline                | 16.96 ± 3.72 <sup>b</sup>  | 42.09 ± 11.46 <sup>ab</sup>  | 48.00 ± 16.06 <sup>a</sup>   | 21.96 ± 4.28 <sup>ab</sup>   | -              | -    | <b>0.03</b>     |
| Asparagine             | 8.38 ± 0.42 <sup>bc</sup>  | 17.92 ± 4.01 <sup>a</sup>    | 15.02 ± 3.15 <sup>ab</sup>   | 9.93 ± 1.51 <sup>bc</sup>    | -              | -    | <b>&lt;0.01</b> |
| Thiaproline            | 1.23 ± 0.58                | 1.25 ± 0.59                  | 1.24 ± 0.58                  | 1.08 ± 0.52                  | 0.07           | 0.57 | 0.54            |
| Aspartic acid          | 7.49 ± 0.34                | 8.93 ± 0.83                  | 8.45 ± 0.55                  | 7.56 ± 0.47                  | 0.54           | 0.59 | 0.22            |
| Methionine             | 6.12 ± 0.29 <sup>b</sup>   | 10.94 ± 2.52 <sup>a</sup>    | 14.04 ± 4.81 <sup>a</sup>    | 6.20 ± 0.29 <sup>b</sup>     | -              | -    | <b>&lt;0.01</b> |
| 4-Hydroxyproline       | 19.36 ± 3.19               | 24.01 ± 4.12                 | 33.85 ± 11.98                | 37.91 ± 14.47                | 0.74           | 0.37 | 0.39            |
| Glutamic acid          | 35.15 ± 5.71               | 54.41 ± 9.78                 | 45.77 ± 7.10                 | 36.55 ± 6.17                 | 0.11           | 0.41 | 0.10            |
| Phenylalanine          | 10.95 ± 1.13 <sup>c</sup>  | 30.32 ± 8.02 <sup>a</sup>    | 30.73 ± 9.09 <sup>ab</sup>   | 12.32 ± 1.47 <sup>bc</sup>   | -              | -    | <b>&lt;0.01</b> |
| α-Aminoadipic acid     | 11.21 ± 0.46               | 11.82 ± 0.81                 | 11.97 ± 0.73                 | 13.86 ± 1.97                 | 0.41           | 0.58 | 0.83            |
| Glutamine              | 68.49 ± 11.29 <sup>b</sup> | 171.93 ± 40.51 <sup>ab</sup> | 240.97 ± 95.72 <sup>a</sup>  | 107.00 ± 34.60 <sup>ab</sup> | -              | -    | <b>0.02</b>     |
| Ornithine              | 17.15 ± 1.15 <sup>b</sup>  | 37.30 ± 9.04 <sup>a</sup>    | 39.82 ± 10.76 <sup>a</sup>   | 20.34 ± 2.23 <sup>ab</sup>   | -              | -    | <b>0.01</b>     |
| Glycine-proline        | 2.77 ± 0.44 <sup>a</sup>   | 1.41 ± 0.44 <sup>b</sup>     | 1.69 ± 0.44 <sup>ab</sup>    | 2.08 ± 0.41 <sup>ab</sup>    | -              | -    | <b>0.05</b>     |
| Lysine                 | 25.36 ± 2.72               | 52.33 ± 11.61                | 50.16 ± 11.41                | 28.32 ± 5.45                 | -              | -    | <b>0.03</b>     |
| Histidine              | 15.97 ± 1.28               | 33.09 ± 8.85                 | 34.22 ± 9.11                 | 21.59 ± 6.90                 | -              | -    | <b>0.03</b>     |
| Hydroxylysine          | 9.39 ± 0.24                | 9.47 ± 0.36                  | 9.55 ± 0.31                  | 10.15 ± 0.94                 | 0.27           | 0.99 | 0.99            |
| Tyrosine               | 11.63 ± 1.35 <sup>b</sup>  | 29.54 ± 7.70 <sup>a</sup>    | 28.63 ± 8.21 <sup>a</sup>    | 13.23 ± 1.65 <sup>ab</sup>   | -              | -    | <b>&lt;0.01</b> |
| Proline-hydroxyproline | 47.74 ± 7.35               | 31.09 ± 7.35                 | 42.15 ± 7.35                 | 43.92 ± 6.86                 | 0.31           | 0.62 | 0.21            |
| Tryptophan             | 10.15 ± 0.36 <sup>b</sup>  | 22.71 ± 5.94 <sup>a</sup>    | 26.83 ± 9.89 <sup>ab</sup>   | 10.17 ± 0.38 <sup>b</sup>    | -              | -    | <b>&lt;0.01</b> |
| Cystathionine          | 0.18 ± 0.18                | 0.50 ± 0.34                  | 0.89 ± 0.71                  | 1.69 ± 1.58                  | 0.91           | 0.56 | 0.43            |
| Cystine                | 2.88 ± 0.76                | 5.34 ± 1.56                  | 5.34 ± 1.53                  | 2.38 ± 0.99                  | 0.68           | 0.84 | 0.06            |

Data are presented as means ± standard error. Bolded *P* values are significant at  $P \leq 0.05$ . When there is a significant interaction, the *P* values for main effects of nutrition and treatment are not shown and replaced with a dash (-). Superscripts(a,b,c) denotes differences at  $P \leq 0.05$ . Concentrations are expressed in μmol/L. Experimental units: ADQ-CON, n = 6; RES-CON, n = 6; ADQ-MEL, n = 6; RES-MEL n = 7. Abbreviations: NUT, nutrition; TRT, treatment; NUT\*TRT, nutrition by treatment interaction; ADQ-CON, adequately fed control; RES-CON, restricted fed control; ADQ-MEL, adequately fed melatonin supplemented; RES-MEL, restricted fed melatonin supplemented.

**Supplemental Table S5.** Individual amino acids in maternal plasma in the summer replicate.

| Amino Acid (μmol/L)    |          |                    |          |                   |          |                    | <i>P</i> value |                   |       |      |         |
|------------------------|----------|--------------------|----------|-------------------|----------|--------------------|----------------|-------------------|-------|------|---------|
|                        | ADQ-CON  |                    | RES-CON  |                   | ADQ-MEL  |                    | RES-MEL        |                   | NUT   | TRT  | NUT*TRT |
| Alanine                | 305.54 ± | 67.55              | 319.15 ± | 61.21             | 350.56 ± | 73.22              | 271.85 ±       | 34.27             | 0.88  | 0.76 | 0.72    |
| Sarcosine              | 7.70 ±   | 0.77               | 7.81 ±   | 0.37              | 8.16 ±   | 0.33               | 7.90 ±         | 0.87              | 0.48  | 0.86 | 0.39    |
| Glycine                | 239.59 ± | 15.61              | 285.05 ± | 15.55             | 315.66 ± | 43.59              | 268.75 ±       | 15.43             | 0.44  | 0.34 | 0.17    |
| α-Aminobutyric acid    | 16.30 ±  | 2.91               | 22.50 ±  | 2.91              | 20.71 ±  | 2.91               | 19.81 ±        | 2.70              | 0.36  | 0.77 | 0.22    |
| Valine                 | 267.23 ± | 15.70              | 202.20 ± | 15.75             | 279.14 ± | 16.37              | 247.25 ±       | 15.30             | <0.01 | 0.08 | 0.32    |
| β-Aminoisobutyric acid | 8.00 ±   | 0.50               | 8.76 ±   | 0.80              | 9.88 ±   | 1.05               | 8.00 ±         | 0.50              | 0.50  | 0.42 | 0.16    |
| Leucine                | 112.69 ± | 12.47              | 95.02 ±  | 12.51             | 122.46 ± | 12.64              | 131.99 ±       | 11.99             | 0.75  | 0.07 | 0.29    |
| Isoleucine             | 73.77 ±  | 8.53               | 61.41 ±  | 8.56              | 76.23 ±  | 8.65               | 90.34 ±        | 8.20              | 0.92  | 0.08 | 0.14    |
| Threonine              | 50.76 ±  | 3.86               | 43.17 ±  | 6.66              | 59.35 ±  | 9.66               | 49.72 ±        | 3.29              | 0.31  | 0.30 | 0.70    |
| Serine                 | 60.56 ±  | 5.94               | 55.33 ±  | 7.50              | 81.48 ±  | 25.53              | 54.02 ±        | 6.02              | 0.55  | 0.91 | 0.68    |
| Proline                | 76.59 ±  | 11.20              | 82.43 ±  | 10.55             | 94.05 ±  | 17.95              | 75.33 ±        | 7.21              | 0.94  | 0.95 | 0.45    |
| Asparagine             | 21.49 ±  | 2.07               | 23.19 ±  | 2.07              | 21.46 ±  | 2.35               | 26.01 ±        | 1.98              | 0.18  | 0.51 | 0.50    |
| Thiaproline            | 1.00 ±   | 0.63               | 1.45 ±   | 0.65              | 1.95 ±   | 0.62               | 1.66 ±         | 0.59              | 0.39  | 0.50 | 0.18    |
| Aspartic acid          | 12.07 ±  | 1.73               | 13.84 ±  | 2.41              | 29.00 ±  | 15.82              | 11.13 ±        | 1.10              | 0.97  | 0.55 | 0.36    |
| Methionine             | 19.44 ±  | 1.81               | 19.89 ±  | 1.81              | 22.43 ±  | 1.81               | 21.76 ±        | 1.68              | 0.95  | 0.19 | 0.76    |
| 4-Hydroxyproline       | 46.29 ±  | 14.08              | 41.55 ±  | 11.25             | 48.17 ±  | 14.62              | 27.97 ±        | 8.96              | 0.99  | 0.80 | 0.88    |
| Glutamic acid          | 104.93 ± | 25.62              | 132.44 ± | 42.32             | 150.19 ± | 41.91              | 85.26 ±        | 24.42             | 0.63  | 0.88 | 0.18    |
| Phenylalanine          | 62.97 ±  | 8.37               | 62.16 ±  | 7.66              | 69.34 ±  | 10.71              | 51.96 ±        | 4.76              | 0.29  | 0.79 | 0.74    |
| α-Aminoadipic acid     | 12.35 ±  | 1.46               | 11.15 ±  | 0.62              | 11.61 ±  | 0.57               | 10.58 ±        | 0.41              | 0.27  | 0.74 | 0.65    |
| Glutamine              | 654.88 ± | 182.88             | 702.49 ± | 184.74            | 601.34 ± | 131.57             | 536.72 ±       | 96.27             | 0.78  | 0.87 | 0.77    |
| Ornithine              | 43.32 ±  | 3.02               | 50.55 ±  | 3.02              | 44.21 ±  | 3.72               | 56.51 ±        | 3.08              | 0.02  | 0.27 | 0.44    |
| Glycine-proline        | 1.71 ±   | 0.82               | 1.94 ±   | 1.13              | 2.81 ±   | 1.34               | 0.46 ±         | 0.44              | 0.38  | 0.66 | 0.27    |
| Lysine                 | 60.13 ±  | 7.65               | 63.75 ±  | 7.63              | 76.54 ±  | 9.19               | 72.43 ±        | 7.77              | 0.98  | 0.12 | 0.63    |
| Histidine              | 51.73 ±  | 6.20               | 52.77 ±  | 3.47              | 56.74 ±  | 7.06               | 60.43 ±        | 3.88              | 0.15  | 0.20 | 0.52    |
| Hydroxylysine          | 9.05 ±   | 0.21 <sup>ab</sup> | 9.34 ±   | 0.21 <sup>a</sup> | 9.33 ±   | 0.26 <sup>ab</sup> | 8.70 ±         | 0.22 <sup>b</sup> | -     | -    | 0.05    |
| Tyrosine               | 54.68 ±  | 4.83               | 53.68 ±  | 6.72              | 67.60 ±  | 10.22              | 52.24 ±        | 4.93              | 0.26  | 0.52 | 0.90    |
| Proline-hydroxyproline | 37.57 ±  | 9.38               | 38.95 ±  | 9.68              | 37.91 ±  | 9.35               | 27.49 ±        | 8.79              | 0.67  | 0.99 | 0.97    |
| Tryptophan             | 40.13 ±  | 3.45               | 36.11 ±  | 3.45              | 41.21 ±  | 3.45               | 37.94 ±        | 3.21              | 0.30  | 0.68 | 0.91    |
| Cystathionine          | 3.71 ±   | 1.91               | 7.16 ±   | 4.05              | 4.69 ±   | 1.86               | 2.96 ±         | 1.54              | 0.89  | 0.92 | 0.40    |
| Cystine                | 22.03 ±  | 1.88               | 23.00 ±  | 1.88              | 25.34 ±  | 1.88               | 23.63 ±        | 1.75              | 0.84  | 0.30 | 0.48    |

Data are presented as means ± standard error. Bolded *P* values are significant at  $P \leq 0.05$ . When there is a significant interaction, the *P* values for main effects of nutrition and treatment are not shown and replaced with a dash (-). Superscripts(a,b,c) denotes differences at  $P \leq 0.05$ . Concentrations are expressed in μmol/L. Experimental units: ADQ-CON, n = 6; RES-CON, n = 6; ADQ-MEL, n = 6; RES-MEL n = 7. Abbreviations: NUT, nutrition; TRT, treatment; NUT\*TRT, nutrition by treatment interaction; ADQ-CON, adequately fed control; RES-CON, restricted fed control; ADQ-MEL, adequately fed melatonin supplemented; RES-MEL, restricted fed melatonin supplemented.

**Supplemental Table S6.** Individual amino acids in fetal plasma in the summer replicate.

| Amino Acid (μmol/L)    | ADQ-CON                   | RES-CON                    | ADQ-MEL                   | RES-MEL                   | <i>P</i> value  |             |                 |
|------------------------|---------------------------|----------------------------|---------------------------|---------------------------|-----------------|-------------|-----------------|
|                        |                           |                            |                           |                           | NUT             | TRT         | NUT*TRT         |
| Alanine                | 450.59 ± 37.25            | 440.04 ± 37.26             | 544.15 ± 45.38            | 462.58 ± 35.79            | 0.27            | 0.14        | 0.40            |
| Sarcosine              | 9.91 ± 0.52 <sup>ab</sup> | 8.69 ± 0.52 <sup>b</sup>   | 9.23 ± 0.52 <sup>ab</sup> | 10.25 ± 0.48 <sup>a</sup> | -               | -           | <b>0.04</b>     |
| Glycine                | 276.83 ± 16.80            | 256.63 ± 36.04             | 289.56 ± 14.23            | 323.04 ± 22.51            | 0.26            | 0.16        | 0.35            |
| α-Aminobutyric acid    | 21.76 ± 2.47              | 27.09 ± 2.48               | 27.77 ± 2.58              | 33.94 ± 2.41              | <b>0.03</b>     | <b>0.02</b> | 0.87            |
| Valine                 | 251.03 ± 17.16            | 183.96 ± 32.23             | 272.30 ± 21.71            | 224.73 ± 11.98            | <b>&lt;0.01</b> | 0.27        | 0.84            |
| β-Aminoisobutyric acid | 9.17 ± 0.53               | 9.69 ± 0.53                | 9.59 ± 0.54               | 11.47 ± 0.50              | <b>0.03</b>     | <b>0.05</b> | 0.23            |
| Leucine                | 90.61 ± 6.23              | 70.77 ± 12.63              | 92.54 ± 3.02              | 85.53 ± 2.21              | 0.10            | 0.54        | 0.79            |
| Isoleucine             | 56.31 ± 4.22              | 42.17 ± 7.83               | 59.75 ± 3.02              | 57.00 ± 2.00              | 0.06            | 0.09        | 0.43            |
| Threonine              | 47.46 ± 5.95              | 45.23 ± 12.02              | 48.70 ± 4.43              | 36.77 ± 2.92              | <b>&lt;0.01</b> | 0.86        | 0.09            |
| Serine                 | 71.43 ± 5.28              | 59.20 ± 8.21               | 70.93 ± 3.05              | 75.72 ± 5.22              | 0.76            | 0.22        | 0.24            |
| Proline                | 105.04 ± 6.25             | 99.15 ± 15.28              | 105.15 ± 8.97             | 114.13 ± 4.29             | 0.48            | 0.58        | 0.48            |
| Asparagine             | 24.88 ± 1.19              | 22.80 ± 2.85               | 23.86 ± 1.30              | 25.75 ± 0.72              | -               | -           | <b>0.05</b>     |
| Thiaproline            | 0.96 ± 0.61               | 1.95 ± 0.62                | 0.97 ± 0.61               | 1.26 ± 0.59               | 0.66            | 0.22        | 0.40            |
| Aspartic acid          | 13.51 ± 1.58              | 14.47 ± 1.59               | 15.23 ± 1.61              | 19.64 ± 1.51              | 0.10            | <b>0.04</b> | 0.31            |
| Methionine             | 20.49 ± 2.21              | 20.00 ± 2.21               | 23.13 ± 2.21              | 19.52 ± 2.05              | 0.36            | 0.62        | 0.48            |
| 4-Hydroxyproline       | 72.81 ± 5.86              | 73.41 ± 5.88               | 79.11 ± 5.94              | 84.03 ± 5.63              | 0.64            | 0.16        | 0.72            |
| Glutamic acid          | 139.15 ± 24.30            | 139.69 ± 24.30             | 191.46 ± 24.30            | 206.71 ± 22.29            | 0.74            | <b>0.02</b> | 0.77            |
| Phenylalanine          | 81.82 ± 4.24              | 72.90 ± 12.68              | 83.59 ± 5.47              | 69.99 ± 4.59              | 0.21            | 0.33        | 0.41            |
| α-Aminoadipic acid     | 12.03 ± 0.33              | 11.56 ± 0.38               | 12.89 ± 0.79              | 11.59 ± 0.29              | 0.22            | 0.88        | 0.90            |
| Glutamine              | 900.51 ± 99.07            | 858.60 ± 99.35             | 796.93 ± 103.26           | 1140.78 ± 96.52           | 0.15            | 0.37        | 0.08            |
| Ornithine              | 51.02 ± 4.84              | 52.27 ± 4.84               | 53.73 ± 5.00              | 59.61 ± 4.58              | 0.47            | 0.30        | 0.64            |
| Glycine-proline        | 2.52 ± 0.56               | 3.14 ± 0.50                | 4.08 ± 1.26               | 4.21 ± 0.72               | 0.27            | 0.14        | 0.85            |
| Lysine                 | 76.16 ± 7.56              | 62.56 ± 7.56               | 75.75 ± 8.88              | 71.16 ± 7.31              | 0.28            | 0.60        | 0.58            |
| Histidine              | 61.94 ± 4.6 <sup>a</sup>  | 53.04 ± 4.63 <sup>ab</sup> | 43.92 ± 4.8 <sup>b</sup>  | 62.18 ± 4.50 <sup>a</sup> | -               | -           | <b>&lt;0.01</b> |
| Hydroxylysine          | 9.84 ± 0.15               | 9.64 ± 0.15                | 9.83 ± 0.16               | 9.83 ± 0.14               | 0.52            | 0.54        | 0.54            |
| Tyrosine               | 66.99 ± 7.69              | 62.38 ± 7.69               | 80.53 ± 7.69              | 59.99 ± 7.14              | 0.11            | 0.47        | 0.30            |
| Proline-hydroxyproline | 52.58 ± 4.45              | 61.13 ± 4.46               | 51.82 ± 4.64              | 64.26 ± 4.34              | <b>0.03</b>     | 0.79        | 0.68            |
| Tryptophan             | 45.18 ± 3.70              | 40.22 ± 3.71               | 42.87 ± 3.86              | 49.74 ± 3.60              | 0.80            | 0.34        | 0.14            |
| Cystathionine          | 6.20 ± 1.19               | 9.04 ± 1.93                | 8.04 ± 2.51               | 10.35 ± 2.00              | 0.10            | 0.46        | 0.38            |
| Cystine                | 20.14 ± 0.99              | 21.39 ± 2.75               | 23.58 ± 1.85              | 21.72 ± 0.80              | 0.80            | <b>0.04</b> | 0.95            |

Data are presented as means ± standard error. Bolded *P* values are significant at  $P \leq 0.05$ . When there is a significant interaction, the *P* values for main effects of nutrition and treatment are not shown and replaced with a dash (-). Superscripts(a,b,c) denotes differences at  $P \leq 0.05$ . Concentrations are expressed in μmol/L. Experimental units: ADQ-CON, n = 6; RES-CON, n = 6; ADQ-MEL, n = 6; RES-MEL n = 7. Abbreviations: NUT, nutrition; TRT, treatment; NUT\*TRT, nutrition by treatment interaction; ADQ-CON, adequately fed control; RES-CON, restricted fed control; ADQ-MEL, adequately fed melatonin supplemented; RES-MEL, restricted fed melatonin supplemented.

**Supplemental Table S7.** Individual amino acids in amnion in the summer replicate.

| Amino Acid (μmol/L)    | ADQ-CON         | RES-CON        | ADQ-MEL        | RES-MEL        | NUT         | TRT         | NUT*TRT |
|------------------------|-----------------|----------------|----------------|----------------|-------------|-------------|---------|
| Alanine                | 247.61 ± 120.46 | 161.39 ± 22.29 | 149.37 ± 31.52 | 139.67 ± 36.38 | 0.70        | 0.45        | 0.70    |
| Sarcosine              | 7.68 ± 0.96     | 6.34 ± 0.46    | 6.30 ± 0.63    | 8.53 ± 2.67    | 0.30        | 0.42        | 0.90    |
| Glycine                | 190.46 ± 43.19  | 201.58 ± 48.70 | 189.75 ± 43.29 | 183.55 ± 74.41 | 0.47        | 0.38        | 0.42    |
| α-Aminobutyric acid    | 13.57 ± 4.19    | 13.54 ± 2.19   | 9.19 ± 1.07    | 9.58 ± 1.52    | 0.88        | 0.06        | 0.25    |
| Valine                 | 196.32 ± 69.56  | 177.73 ± 52.55 | 107.88 ± 37.62 | 101.15 ± 49.88 | 0.77        | 0.13        | 0.95    |
| β-Aminoisobutyric acid | 7.74 ± 0.59     | 6.88 ± 0.35    | 6.83 ± 0.46    | 8.94 ± 2.26    | 0.35        | 0.39        | 0.87    |
| Leucine                | 81.12 ± 29.19   | 88.11 ± 25.84  | 53.34 ± 18.43  | 49.84 ± 24.55  | 0.97        | 0.08        | 0.74    |
| Isoleucine             | 53.77 ± 20.56   | 58.27 ± 17.52  | 34.97 ± 13.28  | 33.91 ± 17.42  | 0.79        | 0.09        | 0.78    |
| Threonine              | 37.60 ± 10.35   | 38.27 ± 9.12   | 31.28 ± 7.30   | 25.38 ± 7.86   | 0.61        | 0.17        | 0.64    |
| Serine                 | 44.72 ± 8.86    | 36.26 ± 7.48   | 31.96 ± 8.06   | 31.41 ± 7.48   | 0.58        | 0.28        | 0.63    |
| Proline                | 61.86 ± 21.02   | 47.55 ± 8.76   | 33.03 ± 8.18   | 40.54 ± 11.06  | 0.93        | 0.23        | 0.54    |
| Asparagine             | 18.63 ± 3.49    | 16.77 ± 2.78   | 14.06 ± 1.99   | 13.53 ± 2.48   | 0.54        | 0.24        | 0.97    |
| Thiaproline            | 2.35 ± 0.59     | 0.43 ± 0.43    | 0.96 ± 0.61    | 0.82 ± 0.53    | <b>0.04</b> | 0.19        | 0.15    |
| Aspartic acid          | 10.17 ± 1.00    | 7.93 ± 0.39    | 8.41 ± 0.62    | 8.17 ± 0.47    | 0.14        | 0.32        | 0.16    |
| Methionine             | 14.68 ± 3.04    | 12.86 ± 2.34   | 10.88 ± 1.83   | 10.27 ± 2.39   | 0.52        | 0.15        | 0.83    |
| 4-Hydroxyproline       | 31.06 ± 12.39   | 22.75 ± 4.85   | 20.70 ± 4.88   | 60.85 ± 42.63  | 0.46        | 0.77        | 0.89    |
| Glutamic acid          | 65.25 ± 14.49   | 41.69 ± 5.71   | 38.01 ± 4.80   | 36.84 ± 5.12   | <b>0.01</b> | 0.17        | 0.91    |
| Phenylalanine          | 41.51 ± 13.60   | 36.18 ± 7.14   | 24.79 ± 5.54   | 22.09 ± 7.05   | 0.71        | 0.11        | 0.94    |
| α-Amino adipic acid    | 13.88 ± 1.34    | 10.55 ± 0.41   | 12.93 ± 2.62   | 12.97 ± 2.74   | 0.11        | 0.52        | 0.40    |
| Glutamine              | 232.72 ± 79.70  | 208.12 ± 34.34 | 173.71 ± 38.50 | 175.49 ± 46.20 | 0.82        | 0.38        | 0.60    |
| Ornithine              | 38.05 ± 8.07    | 36.60 ± 6.47   | 26.64 ± 3.50   | 35.79 ± 10.44  | 0.88        | 0.19        | 0.91    |
| Glycine-proline        | 1.34 ± 0.66     | 1.49 ± 0.67    | 2.09 ± 0.95    | 1.93 ± 0.59    | 0.67        | 0.31        | 0.23    |
| Lysine                 | 50.89 ± 6.56    | 49.13 ± 8.47   | 42.48 ± 8.06   | 57.68 ± 27.69  | 0.43        | 0.15        | 0.58    |
| Histidine              | 41.62 ± 8.00    | 38.57 ± 6.12   | 34.90 ± 6.74   | 27.97 ± 5.62   | 0.28        | 0.12        | 0.59    |
| Hydroxylysine          | 10.38 ± 1.18    | 8.89 ± 0.10    | 9.74 ± 0.79    | 12.46 ± 3.52   | 0.44        | 0.92        | 0.75    |
| Tyrosine               | 41.27 ± 10.79   | 34.34 ± 6.68   | 24.38 ± 4.60   | 21.81 ± 6.58   | 0.31        | <b>0.02</b> | 0.42    |
| Proline-hydroxyproline | 46.93 ± 15.60   | 31.94 ± 7.82   | 44.52 ± 4.60   | 43.37 ± 10.37  | 0.66        | 0.41        | 0.06    |
| Tryptophan             | 28.86 ± 7.86    | 25.54 ± 5.26   | 19.89 ± 4.22   | 18.55 ± 5.56   | 0.19        | 0.07        | 0.79    |
| Cystathionine          | 2.17 ± 1.98     | 0.30 ± 0.19    | 0.89 ± 0.71    | 6.26 ± 6.26    | 0.64        | 0.54        | 0.73    |
| Cystine                | 8.15 ± 1.31     | 11.40 ± 2.55   | 8.94 ± 1.79    | 7.85 ± 1.87    | 0.83        | 0.54        | 0.29    |

Data are presented as means ± standard error. Bolded *P* values are significant at  $P \leq 0.05$ . When there is a significant interaction, the *P* values for main effects of nutrition and treatment are not shown and replaced with a dash (-). Superscripts(a,b,c) denotes differences at  $P \leq 0.05$ . Concentrations are expressed in μmol/L. Experimental units: ADQ-CON, n = 6; RES-CON, n = 6; ADQ-MEL, n = 6; RES-MEL n = 7. Abbreviations: NUT, nutrition; TRT, treatment; NUT\*TRT, nutrition by treatment interaction; ADQ-CON, adequately fed control; RES-CON, restricted fed control; ADQ-MEL, adequately fed melatonin supplemented; RES-MEL, restricted fed melatonin supplemented.
